# Supplementary material for: Cation distribution: a key to ascertain the magnetic interactions in a cobalt substituted Mg–Mn nanoferrite matrix
Source: Royal Society of Chemistry journal article supplement (doi:10.1039/c7cp01993a), 2017-01-01
Supplement: c7cp01993a1.pdf [file c7cp01993a1.pdf]

## Electronic supplementary information

### Cation distribution a key to ascertain the magnetic interactions in cobalt substituted Mg-Mn nanoferrite matrix

Gagan Kumar, R. K. Kotnala, Jyoti Shah, Vijay Kumar, Arun Kumar, Pooja Dhiman, and M. Singh

The X-ray intensity for different planes ( $hkl$ ) for powder specimen was calculated by using following relation:

$$I_{hkl} = |F|_{hkl}^2 \cdot P \cdot L_p \quad (S1)$$

where  $F$  is structure factor,  $P$  is multiplicity factor and  $L_p$  is Lorentz polarization factor. The Lorentz polarization factor was calculated by using the following relation:

$$L_p = \left( \frac{1 + \cos^2 2\theta}{\sin^2 \theta \cos \theta} \right) \quad (S2)$$

$$(Mg_{0.9-x}Mn_{0.1-y}Co_{z-\delta}Fe_{1-\delta})_A [Mg_xMn_yCo_{\delta}Fe_{1-z+\delta}]_B O_4 \quad (S3)$$

$$r_A = [C_{AMg}r(Mg^{2+}) + C_{AMn}r(Mn^{2+}) + C_{AFe}r(Fe^{3+}) + C_{ACo}r(Co^{2+})] \quad (S4)$$

$$r_B = \frac{[C_{BMg}r(Mg^{2+}) + C_{BMn}r(Mn^{2+}) + C_{BFe}r(Fe^{3+}) + C_{BCo}r(Co^{2+})]}{2} \quad (S5)$$

$$a_{th} = (8/3\sqrt{3}) [(r_A + R_o) + \sqrt{3} (r_B + R_o)] \quad (S6)$$

$$T = \frac{1}{\sqrt{3}} \left( \frac{r_A + R_o}{r_B + R_o} \right) + \frac{1}{\sqrt{2}} \left( \frac{R_o}{r_A + R_o} \right) \quad (S7)$$

$$u^{3m} = \frac{\frac{1}{4}R^2 - \frac{2}{3} + \sqrt{\left(\frac{11}{48}R^2 - \frac{1}{18}\right)}}{2R^2 - 2} \quad (S8)$$

$$u^{43m} = \frac{\frac{1}{2}R^2 - \frac{11}{12} + \sqrt{\left(\frac{11}{48}R^2 - \frac{1}{18}\right)}}{2R^2 - 2} \quad (S9)$$

$$u^{43m} = \left[ \frac{1}{a_{th}\sqrt{3}}(r_A + R_o) + \frac{1}{4} \right] \quad (S10)$$

where  $R = \frac{(B - O)}{(A - O)}$ .

The bond lengths  $B-O$  and  $A-O$  are average bond lengths calculated based on the cation distribution; where  $B - O = (r_B + R_o)$  and  $A - O = (r_A + R_o)$ .

$$d_{AX} = a\sqrt{3} \left( U - \frac{1}{4} \right) \quad (S11)$$

$$d_{BX} = a \left[ 3U^2 - \left( \frac{11}{4} \right) U + \frac{43}{64} \right]^{1/2} \quad (\text{S12})$$

$$d_{AXE} = a \sqrt{2} \left( 2U - \frac{1}{2} \right) \quad (\text{S13})$$

$$d_{BXE} = a \sqrt{2} (1 - 2U) \quad (\text{S14})$$

$$d_{BXEU} = a \left( 4U^2 - 3U + \frac{11}{16} \right) \quad (\text{S15})$$
